# Supplementary material for: Allosteric pathways in tetrahydrofolate sensing riboswitch with dynamics correlation network
Source: Royal Society of Chemistry journal article supplement (doi:10.1039/c6mb00630b), 2016-10-31
Supplement: c6mb00630b1.pdf [file c6mb00630b1.pdf]

## **Allosteric Pathways in Tetrahydrofolate Sensing Riboswitch with Dynamics Correlation Network**

Jin-Mai Zhang<sup>1</sup>, Cheng Jiang,<sup>1</sup> Wei Ye,<sup>1</sup> Ray Luo,<sup>2,\*</sup> and Hai-Feng Chen<sup>1,3,\*</sup>

<sup>1</sup>State Key Laboratory of Microbial metabolism, Department of Bioinformatics and Biostatistics, College of Life Sciences and Biotechnology, Shanghai Jiao Tong University, 800 Dongchuan Road, Shanghai, 200240, China

<sup>2</sup>Departments of Molecular Biology and Biochemistry and Biomedical Engineering, University of California, Irvine, CA 92697-3900

<sup>3</sup>Shanghai Center for Bioinformation Technology, 1278 Keyuan Road, Shanghai, 200235, China

\*Corresponding authors

Email addresses: [haifengchen@sjtu.edu.cn](mailto:haifengchen@sjtu.edu.cn); [rluo@uci.edu](mailto:rluo@uci.edu)

Tel: 86-21-34204348

Fax: 86-21-34204348.

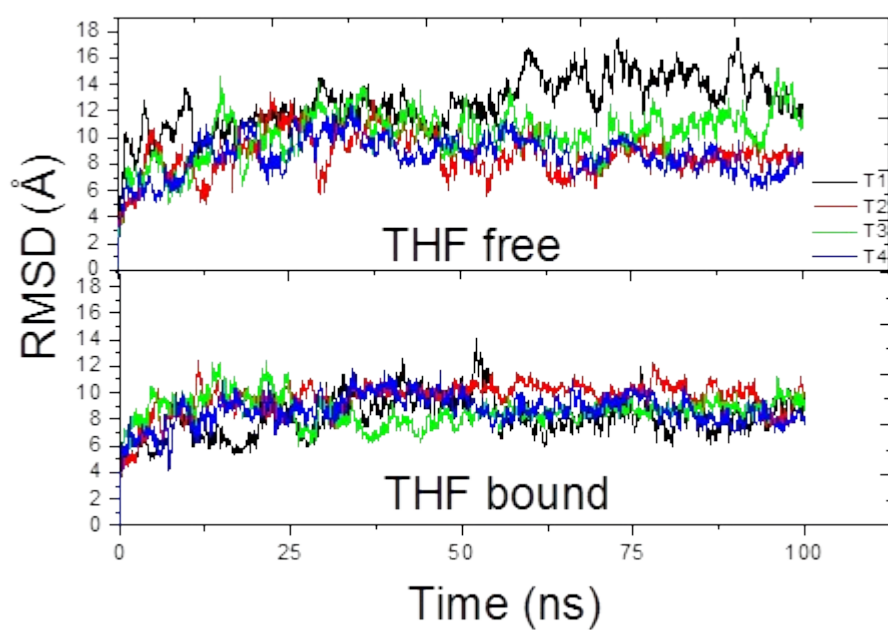

Figure S1. C5' RMSD for THF free and bound systems.
